# Supplementary material for: OmiEmbed: A Unified Multi-Task Deep Learning Framework for Multi-Omics Data
Source: MDPI journal article supplement (doi:10.3390/cancers13123047), 2021-06-18
Supplement: s1 [file s1]

# OmiEmbed: a unified multi-task deep learning framework for multi-omics data – Supplementary information

Xiaoyu Zhang, Yuting Xing, Kai Sun, Yike Guo

This document provides the Supplementary Tables and Figures mentioned in the manuscript.

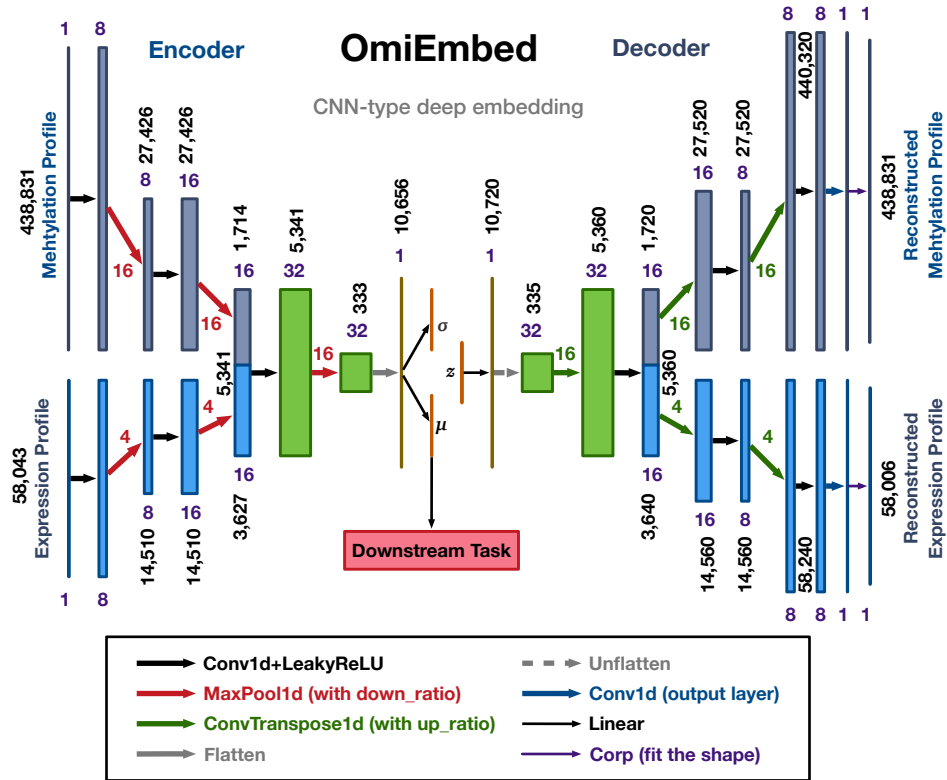

Supplementary Figure 1: The detailed network structure for the CNN-type deep embedding module in OmiEmbed. We used the integration of RNA-Seq gene expression profiles and DNA methylation profiles as an example here. The CNN-type deep embedding module can be applied for any omics type combination.

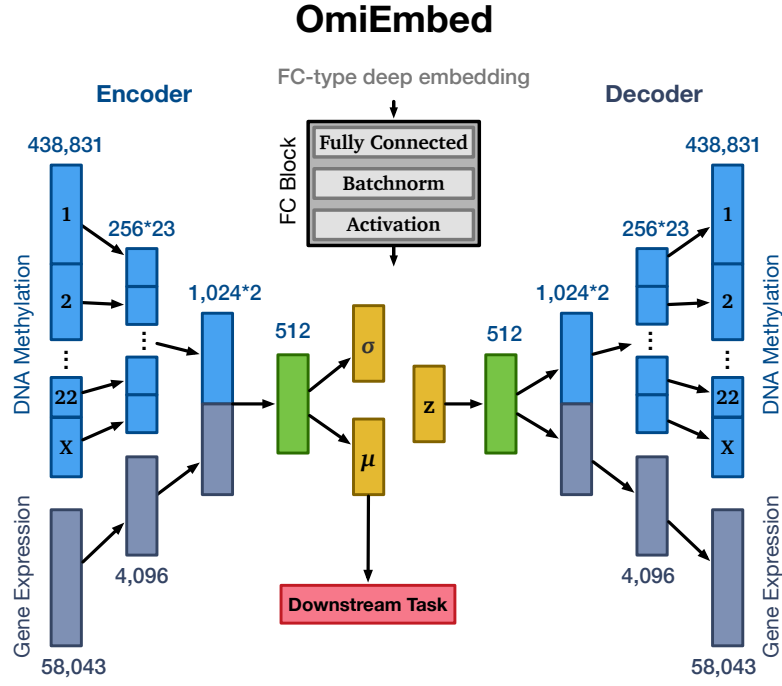

Supplementary Figure 2: The detailed network structure for the FC-type deep embedding module in OmiEmbed. CpG sites in DNA methylation profiles were separated into different FC blocks according to their targeting chromosomes to reduce the number of parameters, prevent overfitting and save the GPU memory. The chromosome separation step would be automatically processed in OmiEmbed with a built-in DNA methylation annotation if the FC-type embedding was selected. We used the integration of RNA-Seq gene expression profiles and DNA methylation profiles as an example here. The FC-type deep embedding module can be applied for any omics type combination.

Supplementary Table 1: Tumour type information of the GDC pan-cancer dataset. Sample numbers of each tumour type and the normal control for RNA-Seq gene expression profiling (A), DNA methylation profiling (B), miRNA expression profiling (C) and multi-omics profiling (M) are shown in corresponding columns.

| Tumour Type                                                      | Abbr. | Project | Count A | Count B | Count C | Count M |
|------------------------------------------------------------------|-------|---------|---------|---------|---------|---------|
| Breast invasive carcinoma                                        | BRCA  | TCGA    | 1104    | 794     | 1098    | 773     |
| Brain lower grade glioma                                         | LGG   | TCGA    | 529     | 534     | 530     | 525     |
| Thyroid carcinoma                                                | THCA  | TCGA    | 510     | 515     | 514     | 509     |
| Head and neck squamous cell carcinoma                            | HNSC  | TCGA    | 502     | 530     | 525     | 497     |
| Prostate adenocarcinoma                                          | PRAD  | TCGA    | 499     | 503     | 499     | 495     |
| Lung adenocarcinoma                                              | LUAD  | TCGA    | 526     | 471     | 518     | 456     |
| Skin cutaneous melanoma                                          | SKCM  | TCGA    | 471     | 473     | 450     | 449     |
| Uterine corpus endometrial carcinoma                             | UCEC  | TCGA    | 548     | 436     | 542     | 431     |
| Bladder urothelial carcinoma                                     | BLCA  | TCGA    | 411     | 416     | 413     | 408     |
| Liver hepatocellular carcinoma                                   | LIHC  | TCGA    | 374     | 380     | 375     | 370     |
| Lung squamous cell carcinoma                                     | LUSC  | TCGA    | 501     | 370     | 478     | 365     |
| Stomach adenocarcinoma                                           | STAD  | TCGA    | 375     | 395     | 436     | 335     |
| Kidney renal clear cell carcinoma                                | KIRC  | TCGA    | 535     | 323     | 521     | 321     |
| Cervical squamous cell carcinoma and endocervical adenocarcinoma | CESC  | TCGA    | 306     | 309     | 309     | 306     |
| Colon adenocarcinoma                                             | COAD  | TCGA    | 471     | 309     | 453     | 303     |
| Kidney renal papillary cell carcinoma                            | KIRP  | TCGA    | 289     | 276     | 292     | 274     |
| Sarcoma                                                          | SARC  | TCGA    | 263     | 265     | 263     | 261     |
| Pheochromocytoma and paraganglioma                               | PCPG  | TCGA    | 183     | 184     | 184     | 183     |
| Pancreatic adenocarcinoma                                        | PAAD  | TCGA    | 178     | 185     | 179     | 178     |
| Esophageal carcinoma                                             | ESCA  | TCGA    | 162     | 186     | 185     | 162     |
| Testicular germ cell tumours                                     | TGCT  | TCGA    | 156     | 156     | 156     | 156     |
| Thymoma                                                          | THYM  | TCGA    | 119     | 124     | 124     | 119     |
| Acute myeloid leukemia                                           | LAML  | TCGA    | 151     | 140     | 188     | 100     |
| Rectum adenocarcinoma                                            | READ  | TCGA    | 167     | 99      | 162     | 99      |
| Mesothelioma                                                     | MESO  | TCGA    | 86      | 87      | 87      | 86      |
| Uveal melanoma                                                   | UVM   | TCGA    | 80      | 80      | 80      | 80      |
| Adrenocortical carcinoma                                         | ACC   | TCGA    | 79      | 80      | 80      | 79      |
| Kidney chromophobe                                               | KICH  | TCGA    | 65      | 66      | 66      | 65      |
| Uterine carcinosarcoma                                           | UCS   | TCGA    | 56      | 57      | 57      | 56      |
| Lymphoid neoplasm diffuse large B-cell lymphoma                  | DLBC  | TCGA    | 48      | 48      | 47      | 47      |
| Cholangiocarcinoma                                               | CHOL  | TCGA    | 36      | 36      | 36      | 36      |
| Ovarian serous cystadenocarcinoma                                | OV    | TCGA    | 379     | 10      | 498     | 7       |
| Glioblastoma multiforme                                          | GBM   | TCGA    | 168     | 153     | 0       | 0       |
| Acute myeloid leukemia (paediatric)                              | AML   | TARGET  | 187     | 0       | 0       | 0       |
| Neuroblastoma                                                    | NBL   | TARGET  | 157     | 0       | 0       | 0       |
| High-risk Wilms tumour                                           | WT    | TARGET  | 126     | 0       | 0       | 0       |
| Normal control                                                   |       |         | 741     | 746     | 675     | 364     |
| Total                                                            |       |         | 11538   | 9736    | 11020   | 8895    |

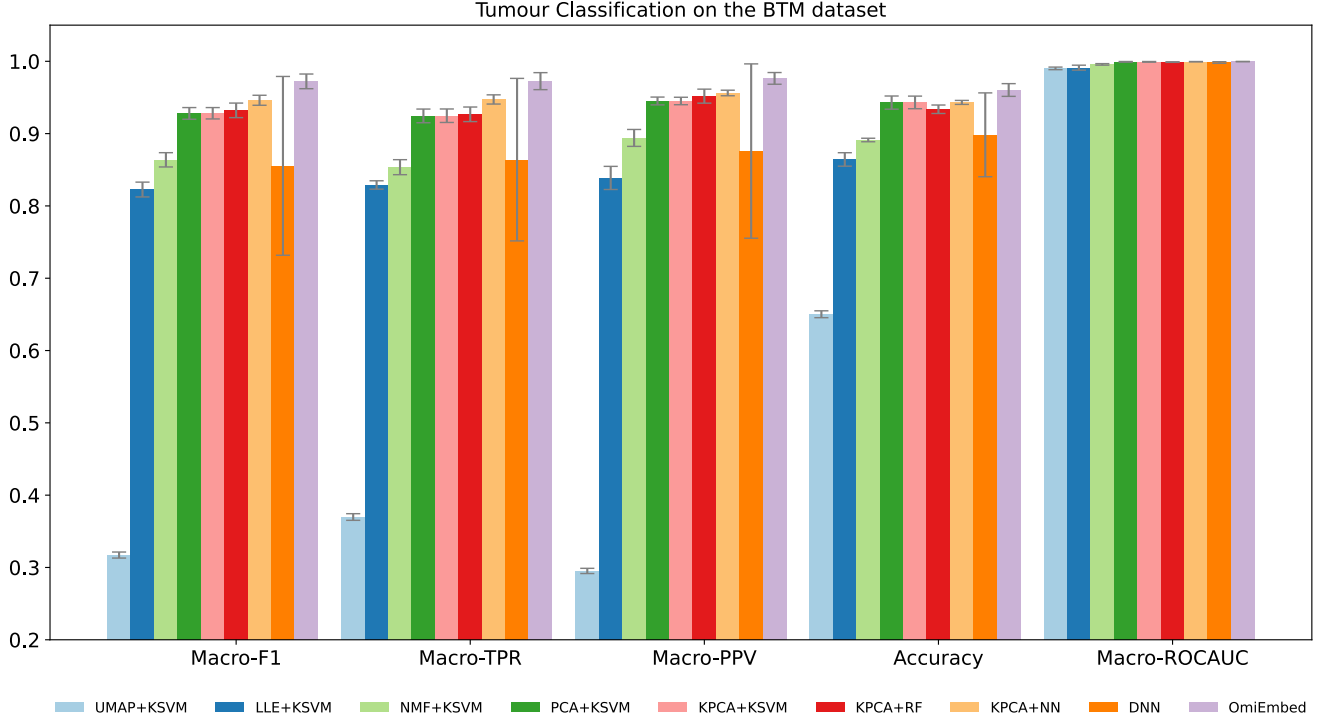

Supplementary Figure 3: Performance comparison of OmiEmbed and other eight methods for the tumour entity classification task on the BTM dataset with the methylation tumour type labels.

Supplementary Table 2: The classification performance on the BTM dataset using the methylation tumour type labels with 5-fold cross-validation, which was measured by macro-averaged F1 score (Macro-F1), macro-averaged true positive rate (Macro-TPR), macro-averaged positive predictive value (Macro-PPV), overall accuracy and macro-averaged area under the receiver operating characteristic curve (Macro-ROCAUC).

|                 | Macro-F1             | Macro-TPR            | Macro-PPV            | Accuracy             | Macro-ROCAUC         |
|-----------------|----------------------|----------------------|----------------------|----------------------|----------------------|
| UMAP+KSVM       | 0.3172±0.0042        | 0.3698±0.0046        | 0.2952±0.0036        | 0.6502±0.0047        | 0.9902±0.0018        |
| LLE+KSVM        | 0.8227±0.0102        | 0.8290±0.0058        | 0.8387±0.016         | 0.8643±0.0093        | 0.9912±0.0034        |
| NMF+KSVM        | 0.8637±0.0099        | 0.8536±0.0104        | 0.8940±0.0117        | 0.8912±0.0024        | 0.9957±0.0011        |
| PCA+KSVM        | 0.9279±0.0081        | 0.9245±0.0095        | 0.9451±0.0054        | 0.9429±0.0091        | 0.9993±0.0004        |
| KPCA+KSVM       | 0.9282±0.0079        | 0.9247±0.0093        | 0.9451±0.0052        | 0.9431±0.0087        | 0.9993±0.0004        |
| KPCA+RF         | 0.9322±0.0101        | 0.9267±0.0101        | 0.9518±0.0097        | 0.9337±0.0059        | 0.9989±0.0004        |
| KPCA+NN         | 0.9461±0.0069        | 0.9472±0.0064        | 0.9562±0.0039        | 0.9431±0.0028        | 0.9995±0.0002        |
| DNN             | 0.8554±0.1236        | 0.8640±0.1124        | 0.8759±0.1205        | 0.8983±0.058         | 0.9984±0.0011        |
| <b>OmiEmbed</b> | <b>0.9723±0.0101</b> | <b>0.9726±0.0118</b> | <b>0.9764±0.0081</b> | <b>0.9603±0.0088</b> | <b>0.9996±0.0002</b> |

Supplementary Table 3: Detailed information for the categorical features predicted by OmiEmbed on the GDC dataset.

|               | Number | Label Examples                                                                  |
|---------------|--------|---------------------------------------------------------------------------------|
| Tumour type   | 37     | BRCA, UCEC, KIRC, LGG, LUAD, THCA, HNSC, LUSC, PRAD, Normal control, etc.       |
| Disease stage | 7      | Primary tumour, Metastatic tumour, Recurrent tumor, Normal control, etc.        |
| Primary site  | 29     | Breast, Kidney, Lung, Brain, Colorectal, Uterus, Thyroid, Prostate, etc.        |
| Race          | 6      | White, Black or African American, Asian, American Indian or Alaska native, etc. |
| Gender        | 2      | Male, Female                                                                    |

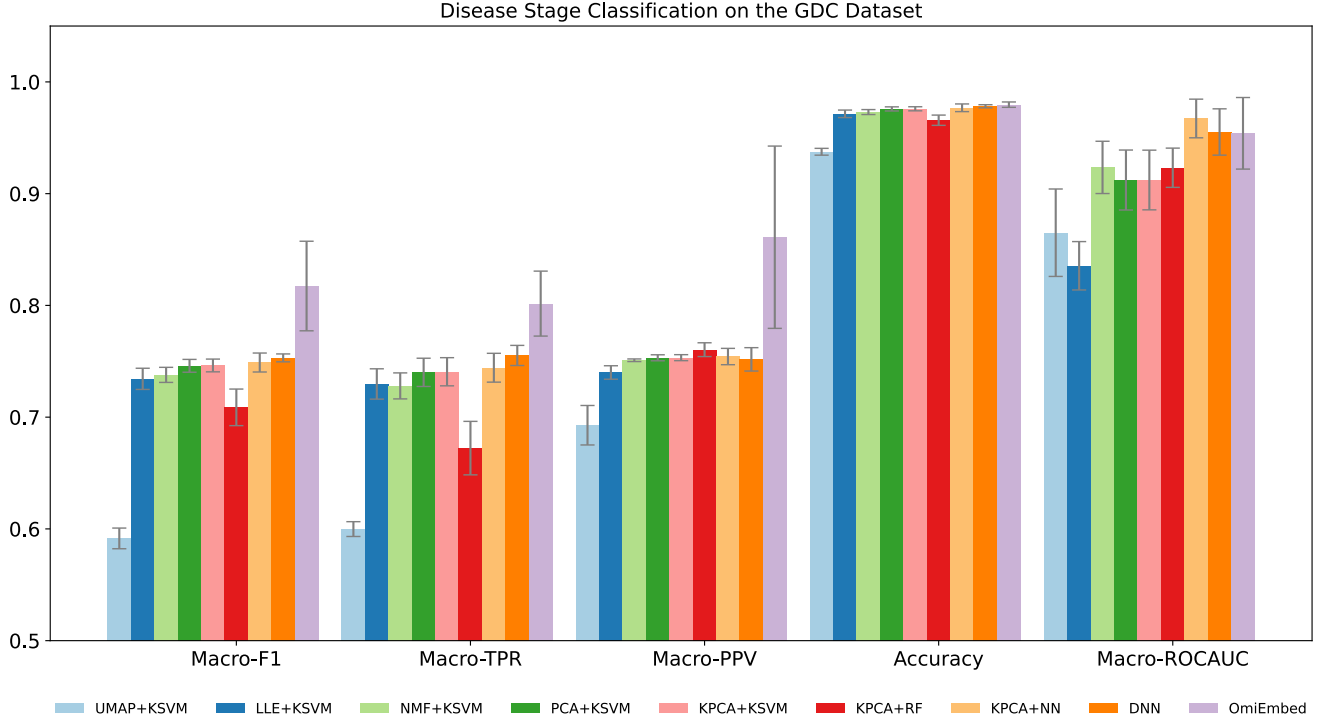

Supplementary Figure 4: Performance comparison of OmiEmbed and other eight methods for the disease stage classification task on the GDC dataset.

Supplementary Table 4: The disease stage classification performance of OmiEmbed and eight other methods on the GDC dataset.

|                 | Macro-F1             | Macro-TPR            | Macro-PPV            | Accuracy             | Macro-ROCAUC         |
|-----------------|----------------------|----------------------|----------------------|----------------------|----------------------|
| UMAP+KSVM       | 0.5915±0.0093        | 0.5998±0.0066        | 0.6928±0.0177        | 0.9375±0.0030        | 0.8650±0.0391        |
| LLE+KSVM        | 0.7343±0.0095        | 0.7297±0.0136        | 0.7400±0.0060        | 0.9714±0.0034        | 0.8355±0.0216        |
| NMF+KSVM        | 0.7378±0.0067        | 0.7280±0.0116        | 0.7509±0.0012        | 0.9730±0.0022        | 0.9235±0.0234        |
| PCA+KSVM        | 0.7459±0.0057        | 0.7401±0.0126        | 0.7531±0.0027        | 0.9758±0.0018        | 0.9122±0.0268        |
| KPCA+KSVM       | 0.7463±0.0057        | 0.7406±0.0126        | 0.7532±0.0027        | 0.9759±0.0018        | 0.9122±0.0267        |
| KPCA+RF         | 0.7088±0.0164        | 0.6723±0.0239        | 0.7604±0.0062        | 0.9657±0.0046        | 0.9232±0.0176        |
| KPCA+NN         | 0.7489±0.0085        | 0.7442±0.0129        | 0.7542±0.0073        | 0.9768±0.0034        | 0.9673±0.0173        |
| DNN             | 0.7530±0.0035        | 0.7552±0.0090        | 0.7517±0.0105        | 0.9782±0.0014        | <b>0.9552±0.0207</b> |
| <b>OmiEmbed</b> | <b>0.8173±0.0401</b> | <b>0.8016±0.0291</b> | <b>0.8610±0.0816</b> | <b>0.9797±0.0024</b> | 0.9540±0.0320        |

Supplementary Table 5: The primary site classification performance of OmiEmbed and eight other methods on the GDC dataset.

|                 | Macro-F1             | Macro-TPR            | Macro-PPV            | Accuracy             | Macro-ROCAUC         |
|-----------------|----------------------|----------------------|----------------------|----------------------|----------------------|
| UMAP+KSVM       | 0.8200±0.0018        | 0.8369±0.0031        | 0.8268±0.0176        | 0.9110±0.0010        | 0.9914±0.0007        |
| LLE+KSVM        | 0.9345±0.0084        | 0.9316±0.0075        | 0.9427±0.0114        | 0.9476±0.0036        | 0.9930±0.0021        |
| NMF+KSVM        | 0.8960±0.0085        | 0.8892±0.0080        | 0.9129±0.0090        | 0.9517±0.0033        | 0.9964±0.0009        |
| PCA+KSVM        | 0.9396±0.0134        | 0.9355±0.0131        | 0.9476±0.0155        | 0.9650±0.0041        | 0.9982±0.0004        |
| KPCA+KSVM       | 0.9395±0.0138        | 0.9353±0.0137        | 0.9476±0.0156        | 0.9649±0.0041        | 0.9982±0.0004        |
| KPCA+RF         | 0.8955±0.0050        | 0.8887±0.0045        | 0.9114±0.0089        | 0.9518±0.0030        | 0.9968±0.0012        |
| KPCA+NN         | 0.9418±0.0062        | 0.9393±0.0071        | 0.9483±0.0057        | 0.9632±0.0027        | 0.9982±0.0005        |
| DNN             | 0.9639±0.0066        | 0.9638±0.011         | 0.9576±0.0123        | 0.9593±0.0116        | 0.9987±0.0006        |
| <b>OmiEmbed</b> | <b>0.9717±0.0066</b> | <b>0.9711±0.0046</b> | <b>0.9734±0.0095</b> | <b>0.9812±0.0023</b> | <b>0.9994±0.0003</b> |

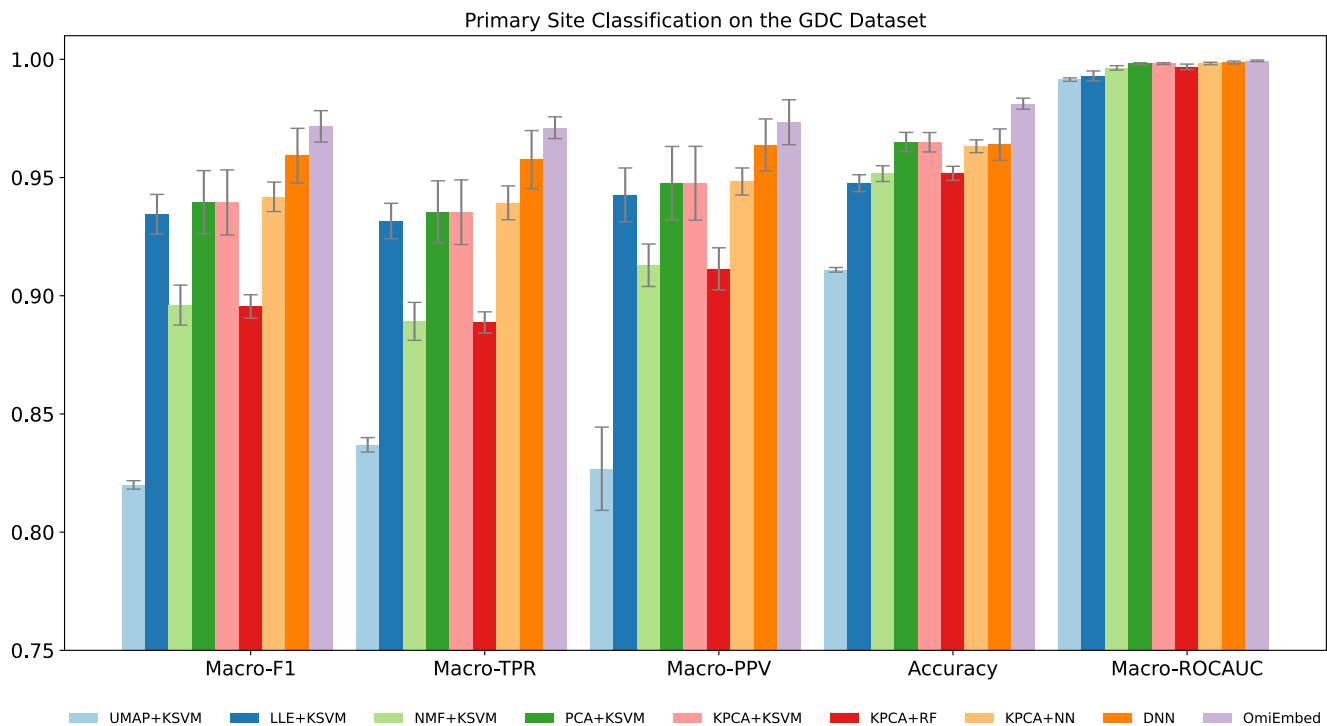

Supplementary Figure 5: Performance comparison of OmiEmbed and other eight methods for the primary site classification task on the GDC dataset.

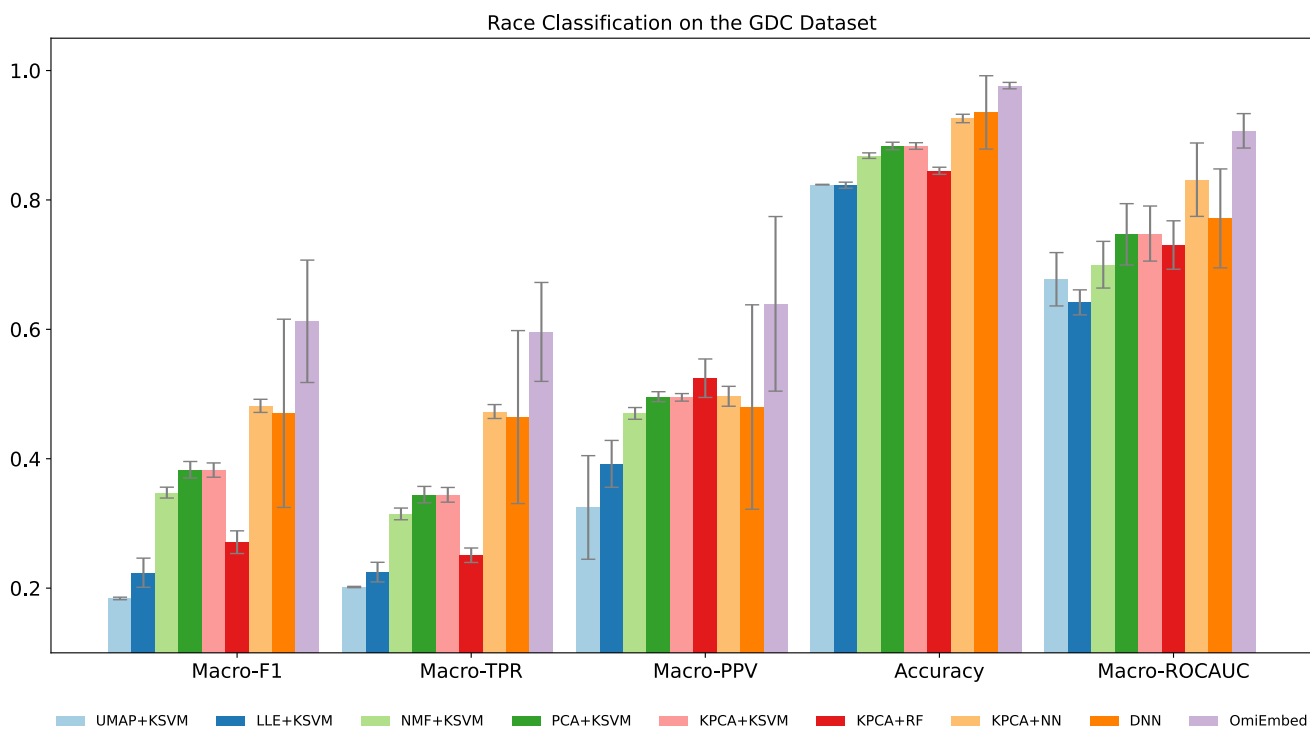

Supplementary Figure 6: Performance comparison of OmiEmbed and other eight methods for the race classification task on the GDC dataset.

Supplementary Table 6: The race classification performance of OmiEmbed and eight other methods on the GDC dataset.

|                 | Macro-F1             | Macro-TPR            | Macro-PPV            | Accuracy             | Macro-ROCAUC         |
|-----------------|----------------------|----------------------|----------------------|----------------------|----------------------|
| UMAP+KSVM       | 0.1840±0.0020        | 0.2017±0.0010        | 0.3247±0.0801        | 0.8237±0.0005        | 0.6774±0.0412        |
| LLE+KSVM        | 0.2238±0.0225        | 0.2247±0.0152        | 0.3921±0.0362        | 0.8228±0.0047        | 0.6417±0.0194        |
| NMF+KSVM        | 0.3476±0.0084        | 0.3147±0.0091        | 0.4700±0.0091        | 0.8685±0.0043        | 0.6999±0.0361        |
| PCA+KSVM        | 0.3830±0.0128        | 0.3445±0.0127        | 0.4959±0.0077        | 0.8834±0.0058        | 0.7469±0.0474        |
| KPCA+KSVM       | 0.3825±0.0110        | 0.3442±0.0114        | 0.4949±0.0058        | 0.8834±0.0051        | 0.7480±0.0426        |
| KPCA+RF         | 0.2710±0.0176        | 0.2508±0.0112        | 0.5244±0.0297        | 0.8451±0.0055        | 0.7303±0.0374        |
| KPCA+NN         | 0.4817±0.0101        | 0.4730±0.0108        | 0.4965±0.0154        | 0.9259±0.0065        | 0.8313±0.0567        |
| DNN             | 0.4702±0.1455        | 0.4644±0.1337        | 0.4799±0.158         | 0.9353±0.0567        | 0.7715±0.0765        |
| <b>OmiEmbed</b> | <b>0.6124±0.0946</b> | <b>0.5960±0.0764</b> | <b>0.6394±0.1349</b> | <b>0.9767±0.0050</b> | <b>0.9068±0.0266</b> |

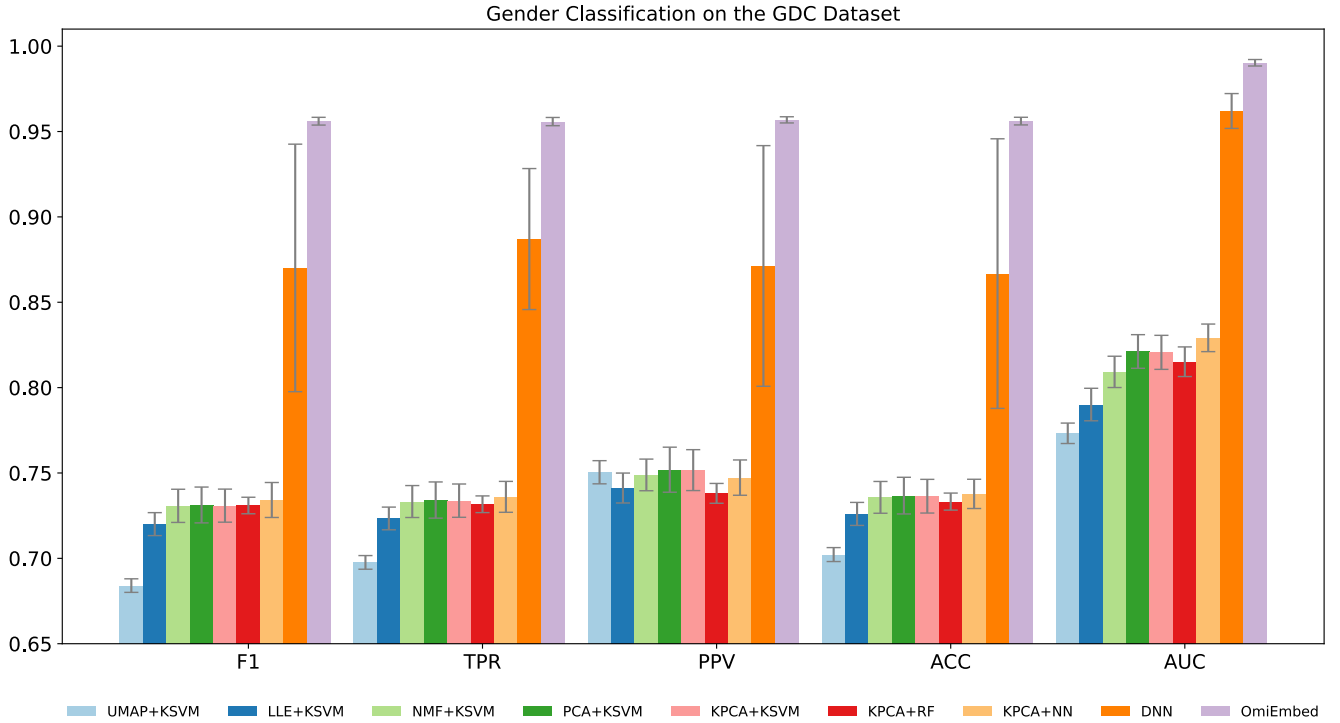

Supplementary Figure 7: Performance comparison of OmiEmbed and other eight methods for the gender classification task on the GDC dataset.

Supplementary Table 7: The gender classification performance of OmiEmbed and eight other methods on the GDC dataset.

|                 | F1                   | TPR                  | PPV                  | Accuracy             | ROCAUC               |
|-----------------|----------------------|----------------------|----------------------|----------------------|----------------------|
| UMAP+KSVM       | 0.6840±0.0040        | 0.6976±0.0040        | 0.7504±0.0068        | 0.7022±0.0041        | 0.7732±0.0060        |
| LLE+KSVM        | 0.7201±0.0067        | 0.7234±0.0066        | 0.7412±0.0088        | 0.7260±0.0067        | 0.7901±0.0095        |
| NMF+KSVM        | 0.7308±0.0097        | 0.7333±0.0094        | 0.7489±0.0093        | 0.7357±0.0093        | 0.8092±0.0092        |
| PCA+KSVM        | 0.7313±0.0105        | 0.7341±0.0106        | 0.7519±0.0132        | 0.7367±0.0107        | 0.8212±0.0098        |
| KPCA+KSVM       | 0.7309±0.0097        | 0.7338±0.0098        | 0.7517±0.0120        | 0.7364±0.0099        | 0.8207±0.0100        |
| KPCA+RF         | 0.7309±0.0048        | 0.7317±0.0049        | 0.7381±0.0058        | 0.7332±0.0050        | 0.8152±0.0087        |
| KPCA+NN         | 0.7342±0.0102        | 0.7360±0.0091        | 0.7473±0.0103        | 0.7378±0.0086        | 0.8292±0.0081        |
| DNN             | 0.8701±0.0725        | 0.887±0.0413         | 0.8713±0.0705        | 0.8668±0.079         | 0.962±0.0102         |
| <b>OmiEmbed</b> | <b>0.9560±0.0023</b> | <b>0.9558±0.0024</b> | <b>0.9568±0.0018</b> | <b>0.9561±0.0022</b> | <b>0.9903±0.0019</b> |

Supplementary Table 8: Detailed tumour type information of the BTM dataset with the methylation class labels defined by the original paper.

| Methylation Class                                                    | Abbr.            | Count |
|----------------------------------------------------------------------|------------------|-------|
| Embryonal tumor with multilayered rosettes                           | ETMR             | 49    |
| Medulloblastoma, WNT                                                 | MB, WNT          | 48    |
| Medulloblastoma, subclass group 3                                    | MB, G3           | 99    |
| Medulloblastoma, subclass group 4                                    | MB, G4           | 181   |
| Medulloblastoma, subclass SHH A (children and adult)                 | MB, SHH CHL AD   | 126   |
| Medulloblastoma, subclass SHH B (infant)                             | MB, SHH INF      | 65    |
| Atypical teratoid/rhabdoid tumor, subclass MYC                       | ATRT, MYC        | 31    |
| Atypical teratoid/rhabdoid tumor, subclass SHH                       | ATRT, SHH        | 51    |
| Atypical teratoid/rhabdoid tumor, subclass TYR                       | ATRT, TYR        | 39    |
| CNS neuroblastoma with FOXR2 activation                              | CNS NB, FOXR2    | 43    |
| CNS high grade neuroepithelial tumor with BCOR alteration            | HGNET, BCOR      | 26    |
| Diffuse midline glioma H3 K27M mutant                                | DMG, K27         | 117   |
| Glioblastoma, IDH wildtype, H3.3 G34 mutant                          | GBM, G34         | 54    |
| Glioblastoma, IDH wildtype, subclass mesenchymal                     | GBM, MES         | 160   |
| Glioblastoma, IDH wildtype, subclass RTK I                           | GBM, RTK I       | 108   |
| Glioblastoma, IDH wildtype, subclass RTK II                          | GBM, RTK II      | 261   |
| Glioblastoma, IDH wildtype, subclass RTK III                         | GBM, RTK III     | 22    |
| Glioblastoma, IDH wildtype, subclass midline                         | GBM, MID         | 33    |
| Glioblastoma, IDH wildtype, subclass MYCN                            | GBM, MYCN        | 33    |
| Central neurocytoma                                                  | CN               | 23    |
| Diffuse leptomeningeal glioneuronal tumor                            | DLGNT            | 12    |
| Cerebellar liponeurocytoma                                           | LIPN             | 11    |
| Low grade glioma, desmoplastic infantile astrocytoma / ganglioglioma | LGG, DIG/DIA     | 8     |
| Low grade glioma, dysembryoplastic neuroepithelial tumor             | LGG, DNT         | 56    |
| Low grade glioma, rosette forming glioneuronal tumor                 | LGG, RGNT        | 12    |
| Retinoblastoma                                                       | RETB             | 19    |
| Esthesioneuroblastoma, subclass A                                    | ENB, A           | 24    |
| Esthesioneuroblastoma, subclass B                                    | ENB, B           | 16    |
| Paraganglioma, spinal non-CIMP                                       | PGG, nC          | 20    |
| Low grade glioma, ganglioglioma                                      | LGG, GG          | 26    |
| Craniopharyngioma, adamantinomatous                                  | CPH, ADM         | 25    |
| Craniopharyngioma, papillary                                         | CPH, PAP         | 20    |
| Pituitary adenoma, ACTH                                              | PITAD, ACTH      | 19    |
| Pituitary adenoma, FSH/LH                                            | PITAD, FSH LH    | 23    |
| Pituitary adenoma, prolactin                                         | PITAD, PRL       | 8     |
| Pituitary adenoma, STH densely granulated, group A                   | PITAD, STH DNS A | 9     |
| Pituitary adenoma, STH densely granulated, group B                   | PITAD, STH DNS B | 13    |
| Pituitary adenoma, STH sparsely granulated                           | PITAD, STH SPA   | 17    |
| Pituitary adenoma, TSH                                               | PITAD, TSH       | 11    |
| Pituicytoma / granular cell tumor / spindle cell oncocytoma          | PITUI            | 30    |
| Ependymoma, myxopapillary                                            | EPN, MPE         | 45    |
| Ependymoma, posterior fossa group A                                  | EPN, PF A        | 127   |
| Ependymoma, posterior fossa group B                                  | EPN, PF B        | 59    |
| Ependymoma, RELA fusion                                              | EPN, RELA        | 90    |
| Ependymoma, spinal                                                   | EPN, SPINE       | 34    |
| Ependymoma, YAP fusion                                               | EPN, YAP         | 11    |
| Subependymoma, posterior fossa                                       | SUBEPN, PF       | 40    |
| Subependymoma, spinal                                                | SUBEPN, SPINE    | 12    |
| Subependymoma, supratentorial                                        | SUBEPN, ST       | 20    |
| Chordoid glioma of the third ventricle                               | CHGL             | 12    |



|                                                                                |                 |             |
|--------------------------------------------------------------------------------|-----------------|-------------|
| Low grade glioma, subependymal giant cell astrocytoma                          | LGG, SEGA       | 22          |
| Low grade glioma, subclass hemispheric pilocytic astrocytoma and ganglioglioma | LGG, PA MID     | 55          |
| Low grade glioma, subclass midline pilocytic astrocytoma                       | LGG, PA PF      | 154         |
| Anaplastic pilocytic astrocytoma                                               | ANA PA          | 46          |
| CNS high grade neuroepithelial tumor with MN1 alteration                       | HGNET, MN1      | 26          |
| Infantile hemispheric glioma                                                   | IHG             | 15          |
| Low grade glioma, MYB/MYBL1                                                    | LGG, MYB        | 27          |
| Low grade glioma, subclass posterior fossa pilocytic astrocytoma               | LGG, PA/GG ST   | 45          |
| (Anaplastic) pleomorphic xanthoastrocytoma                                     | PXA             | 67          |
| Schwannoma                                                                     | SCHW            | 31          |
| Melanotic schwannoma                                                           | SCHW, MEL       | 12          |
| Papillary tumor of the pineal region group A                                   | PTPR, A         | 9           |
| Papillary tumor of the pineal region group B                                   | PTPR, B         | 23          |
| Pineoblastoma group A / intracranial retinoblastoma                            | PIN T, PB A     | 9           |
| Pineoblastoma group B                                                          | PIN T, PB B     | 23          |
| Pineal parenchymal tumor                                                       | PIN T, PPT      | 20          |
| Chordoma                                                                       | CHORDM          | 11          |
| Ewing sarcoma                                                                  | EWS             | 17          |
| Hemangioblastoma                                                               | HMB             | 27          |
| Meningioma                                                                     | MNG             | 149         |
| Solitary fibrous tumor / hemangiopericytoma                                    | SFT HMPC        | 18          |
| CNS Ewing sarcoma family tumor with CIC alteration                             | EFT, CIC        | 13          |
| Melanoma                                                                       | MELAN           | 18          |
| Melanocytoma                                                                   | MELCYT          | 19          |
| Plexus tumor, subclass adult                                                   | PLEX, AD        | 23          |
| Plexus tumor, subclass paediatric A                                            | PLEX, PED A     | 16          |
| Plexus tumor, subclass paediatric B                                            | PLEX, PED B     | 49          |
| IDH glioma, subclass astrocytoma                                               | A IDH           | 172         |
| IDH glioma, subclass high grade astrocytoma                                    | A IDH, HG       | 87          |
| IDH glioma, subclass 1p/19q codeleted oligodendroglioma                        | O IDH           | 163         |
| Lymphoma                                                                       | LYMPHO          | 14          |
| Plasmacytoma                                                                   | PLASMA          | 8           |
| Control tissue, pituitary gland anterior lobe                                  | CONTR, ADENOPIT | 9           |
| Control tissue, cerebellar hemisphere                                          | CONTR, CEBM     | 8           |
| Control tissue, hemispheric cortex                                             | CONTR, HEMI     | 13          |
| Control tissue, hypothalamus                                                   | CONTR, HYPHTAL  | 9           |
| Control tissue, inflammatory tumor microenvironment                            | CONTR, INFLAM   | 24          |
| Control tissue, pineal gland                                                   | CONTR, PINEAL   | 12          |
| Control tissue, pons                                                           | CONTR, PONS     | 12          |
| Control tissue, reactive tumor microenvironment                                | CONTR, REACT    | 23          |
| Control tissue, white matter                                                   | CONTR, WM       | 9           |
| <b>Total</b>                                                                   |                 | <b>3905</b> |

Supplementary Table 9: Detailed tumour type information of the BTM dataset with the pathological class labels defined by the 2016 WHO classification of CNS tumours.

| Class ID | Pathological Class                                  | count |
|----------|-----------------------------------------------------|-------|
| 0        | Glioblastoma, IDH-wildtype                          | 686   |
| 1        | Pilocytic astrocytoma                               | 235   |
| 2        | Medulloblastoma, genetically defined, SHH-activated | 189   |
| 3        | Medulloblastoma, genetically defined, group 4       | 180   |

|    |                                                                                             |     |
|----|---------------------------------------------------------------------------------------------|-----|
| 4  | Anaplastic ependymoma                                                                       | 145 |
| 5  | Ependymoma                                                                                  | 142 |
| 6  | Anaplastic astrocytoma, IDH-mutant                                                          | 125 |
| 7  | Atypical teratoid/rhabdoid tumour                                                           | 121 |
| 8  | Diffuse midline glioma, H3 K27M-mutant                                                      | 115 |
| 9  | Meningioma                                                                                  | 105 |
| 10 | Anaplastic oligodendroglioma, IDH-mutant and 1p/19q-codeleted                               | 97  |
| 11 | Medulloblastoma, genetically defined, group 3                                               | 96  |
| 12 | CNS embryonal tumour, NOS                                                                   | 91  |
| 13 | Diffuse astrocytoma, IDH-mutant                                                             | 82  |
| 14 | Ependymoma, RELA fusion-positive                                                            | 74  |
| 15 | Oligodendroglioma, IDH-mutant and 1p/19q-codeleted                                          | 73  |
| 16 | Dysembryoplastic neuroepithelial tumour                                                     | 60  |
| 17 | Subependymoma                                                                               | 52  |
| 18 | Embryonal tumour with multilayered rosettes, C19MC-altered                                  | 49  |
| 19 | Medulloblastoma, genetically defined, WNT-activated                                         | 47  |
| 20 | Ganglioglioma                                                                               | 45  |
| 21 | Glioblastoma, IDH-mutant                                                                    | 44  |
| 22 | Esthesioneuroblastoma/Olfactory neuroblastoma                                               | 40  |
| 23 | Myxopapillary ependymoma                                                                    | 39  |
| 24 | Pineoblastoma                                                                               | 35  |
| 25 | Atypical choroid plexus papilloma                                                           | 33  |
| 26 | Pleomorphic xanthoastrocytoma                                                               | 32  |
| 27 | Papillary tumour of the pineal region                                                       | 32  |
| 28 | Schwannoma                                                                                  | 30  |
| 29 | Choroid plexus carcinoma                                                                    | 30  |
| 30 | Haemangioblastoma                                                                           | 27  |
| 31 | Atypical meningioma                                                                         | 27  |
| 32 | Gliosarcoma, IDH-wildtype                                                                   | 25  |
| 33 | Choroid plexus papilloma                                                                    | 25  |
| 34 | Adamantinomatous craniopharyngioma                                                          | 25  |
| 35 | Low tumour cell content Glioblastoma, IDH wildtype with high inflammatory cell infiltration | 24  |
| 36 | Pituitary adenoma gonadotropin producing                                                    | 23  |
| 37 | Retinoblastoma                                                                              | 22  |
| 38 | Central neurocytoma                                                                         | 22  |
| 39 | Subependymal giant cell astrocytoma                                                         | 21  |
| 40 | Pituitary adenoma densely granulated GH/STH producing                                       | 21  |
| 41 | Paraganglioma                                                                               | 21  |
| 42 | Anaplastic pleomorphic xanthoastrocytoma                                                    | 21  |
| 43 | Papillary craniopharyngioma                                                                 | 20  |
| 44 | Anaplastic pilocytic astrocytoma                                                            | 20  |
| 45 | Pituitary adenoma ACTH producing                                                            | 19  |
| 46 | Melanocytoma                                                                                | 19  |
| 47 | Solitary fibrous tumour / haemangiopericytoma                                               | 18  |
| 48 | Pituitary adenoma sparsely granulated GH/STH producing                                      | 18  |
| 49 | Ewing sarcoma / peripheral primitive neuroectodermal tumour                                 | 16  |
| 50 | Malignant melanoma                                                                          | 16  |
| 51 | Pineal parenchymal tumour of intermediate differentiation                                   | 14  |
| 52 | Anaplastic pilocytic astrocytoma (unresolved status)                                        | 14  |
| 53 | Diffuse large B cell lymphoma (DLBCL)                                                       | 14  |
| 54 | Anaplastic astrocytoma, IDH-wildtype                                                        | 13  |
| 55 | Normal cortex                                                                               | 13  |
| 56 | Chordoid glioma of the third ventricle                                                      | 12  |
| 57 | Angiocentric glioma                                                                         | 12  |
| 58 | Normal Pons                                                                                 | 12  |

|              |                                                                                        |             |
|--------------|----------------------------------------------------------------------------------------|-------------|
| 59           | Normal pineal gland                                                                    | 12          |
| 60           | Cerebellar liponeurocytoma                                                             | 11          |
| 61           | Rosette-forming glioneuronal tumour                                                    | 11          |
| 62           | Anaplastic (malignant) meningioma                                                      | 11          |
| 63           | Chordoma                                                                               | 11          |
| 64           | Pituitary adenoma TSH producing                                                        | 11          |
| 65           | Pituicytoma                                                                            | 11          |
| 66           | Melanotic schwannoma                                                                   | 10          |
| 67           | Granular cell tumour                                                                   | 10          |
| 68           | Diffuse leptomeningeal glioneuronal tumour                                             | 10          |
| 69           | Normal corpus callosum                                                                 | 9           |
| 70           | Spindle cell oncocytoma                                                                | 9           |
| 71           | Normal hypothalamus                                                                    | 9           |
| 72           | Astroblastoma                                                                          | 9           |
| 73           | Normal pituitary anterior lobe                                                         | 8           |
| 74           | Desmoplastic infantile astrocytoma and ganglioglioma                                   | 8           |
| 75           | Normal cerebellum cortex                                                               | 8           |
| 76           | Pituitary adenoma prolactin producing                                                  | 8           |
| 77           | Pilomyxoid astrocytoma                                                                 | 8           |
| 78           | Plasmacytoma                                                                           | 8           |
| 79           | Anaplastic ganglioglioma                                                               | 5           |
| 80           | Chordoid meningioma                                                                    | 4           |
| 81           | Low grade glioma with MYB alteration (no official WHO diagnosis)                       | 4           |
| 82           | Diffuse astrocytoma, IDH-wildtype                                                      | 3           |
| 83           | Paediatric diffuse astrocytoma (unresolved status)                                     | 3           |
| 84           | Infantile hemispheric glioma (no official WHO diagnosis)                               | 3           |
| 85           | Medulloblastoma, NOS                                                                   | 3           |
| 86           | CNS high-grade neuroepithelial tumour with MN1 alteration (no official WHO diagnosis)  | 2           |
| 87           | Pilocytic astrocytoma, pilomyxoid variant                                              | 2           |
| 88           | Normal pituitary anterior lobe (fetal tissue, gestation week 20)                       | 1           |
| 89           | Dysplastic gangliocytoma of cerebellum (Lhermitte-Duclos)                              | 1           |
| 90           | Gangliocytoma                                                                          | 1           |
| 91           | CNS high-grade neuroepithelial tumour with BCOR alteration (no official WHO diagnosis) | 1           |
| 92           | Tanycytic ependymoma                                                                   | 1           |
| 93           | Rhabdoid meningioma                                                                    | 1           |
| <b>Total</b> |                                                                                        | <b>3905</b> |
